# Supplementary material
Source: publisher figshare collection journal article supplement (https://gsajournals.figshare.com/ndownloader/files/15511970)
Supplement: Supplementary file 1 [file 15511970]

**Supporting Table 1: Semi-quantitative cardiac and renal scoring system**

**A. Cardiac scoring system**

Cardiomyocyte vacuolation

0= normal histologic appearance

1= one to two vacuolated myofibers/20X field

2= three to four vacuolated myofibers/20X field

3= five or more vacuolated myofibers/20X field

Infiltration by mononuclear cells

0= normal histologic appearance

1= one cluster/20X field

2= two clusters/20X field

3= three or more clusters/20X field

Interstitial fibrosis with myofiber disorganization/atrophy

0= normal histologic appearance

1= one focus/20X field

2= two foci/20X field

3= three or more foci/20X field

Adapted from: Ferrans 1 , Bertinchant 2, Desai 3, 4

**B. Renal scoring system**

All criteria scored from 0-3 on the basis of percentage of tissue involved

0= none

1 < 10%

2= 10-50%

3 > 50%

Glomerular pathology

Segmental atrophy of glomerular tuft

Periglomerular mononuclear cell infiltration

Glomerular hypercellularity

Accumulation of mesangial matrix

Hypertrophy of parietal epithelial cells

Periglomerular fibrosis

Glomerulosclerosis

Tubulointerstitial pathology

Focal tubular basophilia

Interstitial mononuclear cells

Acute tubular epithelial necrosis

Tubular loss

Tubular atrophy, dilation and protein casts

Interstitial fibrosis
